# Supplementary material
Source: PubMed Central journal article supplement (PMC3936478)
Supplement: NIHMS556981-supplement-1_si_001.pdf [file NIHMS556981-supplement-1_si_001.pdf]

## Supporting Information:

### Excitation Wavelength Dependent O<sub>2</sub> Release from Copper(II)-Superoxide Compounds: Laser Flash-Photolysis Experiments and Theoretical Studies

Claudio Saracini<sup>†</sup>, Dimitrios G. Liakos<sup>‡</sup>, Jhon E. Zapata Rivera<sup>§</sup>, Frank Neese<sup>‡</sup>, Gerald J. Meyer<sup>†</sup>, and Kenneth D. Karlin<sup>\*†</sup>

<sup>†</sup>*Department of Chemistry, The Johns Hopkins University, Baltimore, Maryland 21218*

<sup>‡</sup>*Max-Planck-Institut für Chemische Energie Konversion, Stiftstrasse 34-36, 45470 Mülheim*

<sup>§</sup>*Departament de Química Física i Inorgànica, Universitat Rovirai Virgili, c/ Marcel·lí Domingo, s/n. 43007 Tarragona, Spain*

\*To whom correspondence should be addressed: EMAIL: [karlin@jhu.edu](mailto:karlin@jhu.edu)

#### Contents:

1. **Materials and Methods**
2. **Determination of O<sub>2</sub> solubility in 2-MeTHF**
3. **Gas Mixing**
4. **Transient Absorption Experimental Details**
5. **Data Treatment for Benchtop Titration Measurements**
6. **Model Used for the Kinetic Studies**
7. **Quantum Efficiency Measurements**
8. **DFT Calculations**
9. **Table S(1): Comparison of Equilibrium Parameters Determined with Two Different Methods**
10. **Figure S(1): Fit for the Determination of the Equilibrium Constant at -65<sup>0</sup>C**
11. **Figure S(2): Van't Hoff Plot Determined from Benchtop Titration Experiments**
12. **Figure S(3): Determination of  $k_{O_2}$  and  $k_{-O_2}$  in Pseudo-First-Order Conditions**
13. **Figure S(4): Eyring Analysis on Data Obtained from Transient Absorption Spectroscopy Exciting with either  $\lambda_{exc} = 436$  nm or  $\lambda_{exc} = 683$  nm Light**
14. **Figure S(5): Van't Hoff Plot Determined from Transient Absorption Spectroscopic Data**
15. **Figure S(6): Molecular Orbital Diagram for the [(TMG<sub>3</sub>tren)Cu(O<sub>2</sub>)]<sup>+</sup> Ground State**
16. **Figure S(7): Calculated O-O Bond Length Trend upon Cu-O Bond Stretching**
17. **Figure S(8): Relation Between  $K_{O_2}$  and Solvent Dielectric Constant**
18. **Figure S(9): Transient Absorption Spectra Obtained for 1 using  $\lambda_{exc} = 436$  and 683 nm light**
19. **Figure S(10): Absorption Spectra and Transient Absorption Spectra of 2 and 4**
20. **Figure S(11): Estimation of Activation Parameters for 4 + O<sub>2</sub> -> 2: Eyring plot**
21. **References**

## 1. Materials and Methods

All materials purchased were of highest purity available from Sigma-Aldrich Chemical or Tokyo Chemical Industries (TCI) and used as received, unless specified otherwise. 2-Methyltetrahydrofuran (MeTHF) and tetrahydrofuran were distilled under an inert atmosphere from Na/benzophenone and degassed with argon prior to use. Pentane and acetonitrile were freshly distilled from calcium hydride under an inert atmosphere and degassed prior to use.  $[(\text{TMG}_3\text{tren})\text{Cu}^{\text{I}}]\text{BArF}$  and  $[\text{Cu}^{\text{I}}(\text{MeCN})_4]\text{BArF}$  were synthesized according to literature protocols,<sup>1</sup> and their identity and purity were verified by elemental analysis and/or  $^1\text{H-NMR}$ . Synthesis and manipulations of copper salts were performed according to standard Schlenk techniques or in an MBraun glovebox (with  $\text{O}_2$  and  $\text{H}_2\text{O}$  levels below 1 ppm). UV-Vis spectra were recorded with a Cary 50 Bio spectrophotometer equipped with a liquid nitrogen chilled Unisoku USP-203-A cryostat. NMR spectroscopy was performed on Bruker 300 and 400 MHz instruments with spectra calibrated to either internal tetramethylsilane (TMS) standard or to residual protio solvent. The ligands (TMG<sub>3</sub>tren and PV-TMPA) and the related copper(I) complexes ( $[(\text{TMG}_3\text{tren})\text{CuI}]\text{BArF}$  and  $[(\text{PV-TMPA})\text{CuI}]\text{BArF}$ ) were synthesized by literature procedures.<sup>1a, 2</sup>

## 2. Determination of O<sub>2</sub> solubility in 2-MeTHF

The solubility of  $\text{O}_2$  in 2-MeTHF was determined using mole fractions and temperature-dependent data given in the literature.<sup>3</sup> The molar fraction solubility of  $\text{O}_{2(\text{g})}$  in 2-MeTHF at 1 atmosphere and 311.03 K was extrapolated from the available data to be  $5.79973 \cdot 10^{-4}$ . Molar fraction solubility at different temperatures were obtained using the data available for the molar fraction solubility of  $\text{O}_{2(\text{g})}$  in diethyl ether as a function of temperature<sup>4</sup> fitting the data to the experimentally determined from Ref. 3.

## 3. Gas Mixing

Carbon monoxide ( $\text{CO}$ ; Air Gas East, grade 2.3) used for the flash-and-trap experiment performed for  $[(\text{TMPA})\text{Cu}^{\text{I}}(\text{CO})]\text{BArF}$  in 2-MeTHF was treated by passing through an R & D Separations oxygen/moisture trap (Agilent Technologies OT3-4). Dioxygen ( $\text{O}_2$ ; Air Gas East, grade 4.4) was dried by passing the gas through a short column of supported P4010 (Aquasorb, Mallinkrodt). Red rubber tubing (Fisher Scientific; inner diameter: 1/4 in.; thickness: 3/16 in.) was used to attach the gas cylinders fitted with appropriate regulators to two MKS Instruments Mass-Flo Controllers (MKS Type 1179A) regulated by an MKS Instruments Multi-Channel Flow Ratio/Pressure Controller (MKS Type 647C). The gas mixtures ( $\text{N}_2/\text{CO}$  and  $\text{O}_2/\text{CO}$  for  $[(\text{TMPA})\text{Cu}^{\text{I}}(\text{CO})]\text{BArF}$  and  $\text{N}_2/\text{O}_2$  for  $[(\text{TMG}_3\text{tren})\text{Cu}(\text{O}_2)]\text{BArF}$  and  $[(\text{PV-TMPA})\text{Cu}(\text{O}_2)]\text{BArF}$ ) were determined by the set flow rates of the two gases. For example, a 10%  $\text{O}_2$  mixture would be made by mixing  $\text{O}_2$  at a rate of 10 standard cubic centimeters per minute (sccm) with  $\text{CO}$  at 90 sccm for a total flow of 100 sccm. By varying the ratio of  $\text{O}_2$  and  $\text{CO}$  with the gas mixer, the concentration of the gases were determined by taking the percentage of the gas added and multiplying by the solubility of the corresponding gas in 2-MeTHF. For example, if  $[\text{O}_2] = 0.0087 \text{ M}$  and  $[\text{CO}] = 0.0092 \text{ M}$  at  $-70^\circ\text{C}$ , if the  $\text{O}_2/\text{CO}$  flow rate is 3/7 (or

30% of the total gas flow is O<sub>2</sub>), then, the concentration of O<sub>2</sub> in 2-MeTHF = 0.30 x 0.0087 M = 0.0026 M and CO = 0.70 x 0.0092 M = 0.0064 M.

#### **4. Transient Absorption Experimental Details**

Experimental information for the setup of the Nd:YAG flash-photolysis apparatus has been previously reported.<sup>5</sup> The apparatus was equipped with liquid nitrogen chilled Unisoku USP-203-A cryostat and a pressurized (~400 psi) H<sub>2</sub> Raman shifter tube to obtain the Stokes-shifted 683 and the anti-Stokes-shifted 436 nm excitation wavelengths. The samples, [(TMG<sub>3</sub>tren)Cu(O<sub>2</sub>)]BArF and [(PV-TMPA)Cu(O<sub>2</sub>)]BArF, were irradiated with λ<sub>ex</sub> = 436 nm or λ<sub>ex</sub> = 683 nm pulsed light (15 mJ/pulse) and data was collected at the monitored wavelengths from averages of 60 laser pulses. Samples (320-360 μM) were prepared under an inert atmosphere (drybox) in 1 cm quartz cuvettes with four polished windows made custom by Quark glass. The cuvettes were equipped with a 14/20 joint and Schlenk stopcock. Gas mixtures were added to sample solutions through direct bubbling through a 24-inch needle (19-gauge) for 5 seconds for 10 times with intervals of 10 seconds between each time. During data collection the gas flowed through the headspace of the sample solution into the cuvette.

#### **5. Data Treatment for Benchtop Titration Measurements**

The equilibrium constant for the following chemical reaction

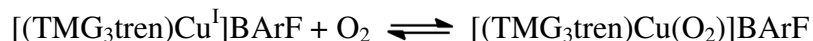

can be written as

$$K_{\text{O}_2} = [\text{LCuO}_2] / [\text{LCu}^{\text{I}}] [\text{O}_2] \quad (1)$$

having called TMG<sub>3</sub>tren = L and having omitted the counter anion BArF for simplicity. Substitution of [LCu<sup>I</sup>] = [LCu<sup>I</sup>]<sub>0</sub> - [LCuO<sub>2</sub>] (2) into (1) (where [LCu<sup>I</sup>]<sub>0</sub> is the initial concentration of LCu<sup>I</sup>, before adding O<sub>2</sub>), gives equation (3):

$$[\text{LCuO}_2] / [\text{O}_2] = K_{\text{O}_2} ( [\text{LCu}^{\text{I}}]_0 - [\text{LCuO}_2] ) \quad (3)$$

Considering, now, that O<sub>2</sub> does not absorb light at the wavelength λ = 449 nm, we choose to monitor LCu<sup>I</sup> and LCuO<sub>2</sub>. Consequently, the total observed absorbance at 449 nm will be given by the following equation:

$$\Delta\text{Abs}_{449} = \varepsilon_{449}^{\text{Cu}} [\text{LCu}^{\text{I}}] + \varepsilon_{449}^{\text{CuO}_2} [\text{LCuO}_2] \quad (4)$$

where ε<sub>449</sub><sup>Cu</sup> and ε<sub>449</sub><sup>CuO<sub>2</sub></sup> are the extinction coefficients of LCu<sup>I</sup> and LCuO<sub>2</sub> at 449 nm. Substituting equation (2) in equation (4) and rearranging gives:

$$[\text{LCuO}_2] = \Delta\text{Abs}_{449} / \Delta\varepsilon_{449} \quad (5)$$

where

$\Delta \text{Abs}_{449} = \text{Abs}_{449}^0 - \text{Abs}_{449}$  is the optical density difference at 449 nm before ( $\text{Abs}_{449}^0$ ) and after ( $\text{Abs}_{449}$ ) adding  $\text{O}_2$  to  $\text{LCu}^{\text{I}}$

and

$\Delta \varepsilon_{449} = \varepsilon_{449}^{\text{CuO}_2} - \varepsilon_{449}^{\text{Cu}}$  is the difference between the extinction coefficients of  $\text{LCuO}_2$  and  $\text{LCu}^{\text{I}}$  at 449 nm.

Substitution of equation (5) into equation (3) and rearrangement gives the model used to fit the experimental data from the benchtop titration experiments performed in this work:

$$\Delta \text{Abs}_{449} = (K_{\text{O}_2} [\text{LCu}^{\text{I}}]_0 \Delta \varepsilon_{449} [\text{O}_2]) / (1 + K_{\text{O}_2} [\text{O}_2]) \quad (6)$$

A fit of the experimental points ( $[\text{O}_2]$ ;  $\Delta \text{Abs}_{449}$ ) with equation (6) will give the equilibrium constant  $K_{\text{O}_2}$  (Figure S1).

The same titration measurements performed in a temperature range from  $-30^\circ\text{C}$  to  $-70^\circ\text{C}$  give the correspondent values of the equilibrium constants. Data can be fitted with the Van't Hoff equation  $\ln(K_{\text{O}_2}) = -(\Delta H^0 / RT) + (\Delta S^0 / R)$  (Figure S2).

## **6. Model Used for Kinetic Studies**

A kinetic "relaxation" method was used as a model for the reaction between  $[(\text{TMG}_3\text{tren})\text{Cu}^{\text{I}}]\text{BArF}$  and  $\text{O}_2$  where the equilibrium concentrations of the species in solution were perturbed by laser excitation of  $[(\text{TMG}_3\text{tren})\text{Cu}(\text{O}_2)]\text{BArF}$  and the return to equilibrium was monitored spectroscopically.

Let's consider, again, the following equilibrium:

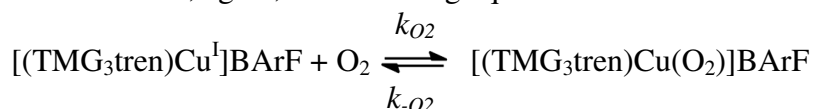

Again,  $\text{TMG}_3\text{tren} = \text{L}$  and the counter anion  $\text{BArF}$  was omitted for simplicity. The rate of formation of  $\text{LCuO}_2$  will be the following:

$$d[\text{LCuO}_2] / dt = k_{02} [\text{LCu}^{\text{I}}] [\text{O}_2] - k_{-02} [\text{LCuO}_2] \quad (7)$$

At equilibrium, the net rate of formation of  $\text{LCuO}_2$  will be zero:

$$d[\text{LCuO}_2] / dt = k_{02} [\text{LCu}^{\text{I}}]_{\text{eq}} [\text{O}_2]_{\text{eq}} - k_{-02} [\text{LCuO}_2]_{\text{eq}} = 0 \quad (8)$$

Upon laser excitation of  $[(\text{TMG}_3\text{tren})\text{Cu}(\text{O}_2)]\text{BArF}$  we will alter the concentration of the species in solution as follows:

$$[\text{LCu}^{\text{I}}] = [\text{LCu}^{\text{I}}]_{\text{eq}} + \alpha$$

$$[\text{O}_2] = [\text{O}_2]_{\text{eq}} + \alpha \quad (9)$$

$$[\text{LCuO}_2] = [\text{LCuO}_2]_{\text{eq}} - \alpha$$

Substitution of equations (9) into equation (7) and derivative with respect to  $\alpha$  gives the following:

$$-d\alpha / dt = k_{\text{O}_2} [\text{LCu}^{\text{I}}]_{\text{eq}} [\text{O}_2]_{\text{eq}} - k_{-02} [\text{LCuO}_2]_{\text{eq}} + k_{\text{O}_2} \alpha ( [\text{LCu}^{\text{I}}]_{\text{eq}} + [\text{LCuO}_2]_{\text{eq}} ) + k_{\text{O}_2} \alpha^2 + k_{-02} \alpha$$

The summation of the first two terms on the right side of the equation is zero according to equation (8) and the term " $k_{\text{O}_2} \alpha^2$ " can be neglected since  $\alpha$  is small. Consequently, the equation becomes:

$$-d\alpha / dt = \alpha ( k_{\text{O}_2} [\text{LCu}^{\text{I}}]_{\text{eq}} + k_{\text{O}_2} [\text{O}_2]_{\text{eq}} + k_{-02} )$$

which gives a first order decay of  $\alpha$  over time with decay constant:

$$k_{\text{obs}} = k_{\text{O}_2} ( [\text{LCu}^{\text{I}}]_{\text{eq}} + [\text{O}_2]_{\text{eq}} ) + k_{-02}$$

In our experiments,  $[\text{O}_2] \gg [\text{LCu}^{\text{I}}]$  so we can assume that  $[\text{LCu}^{\text{I}}]_{\text{eq}} + [\text{O}_2]_{\text{eq}} \approx [\text{O}_2]_0$  where  $[\text{O}_2]_0$  is the total concentration of  $\text{O}_2$  present in solution at all times. The observed rate constant is then

$$k_{\text{obs}} = k_{\text{O}_2} [\text{O}_2]_0 + k_{-02} (10)$$

Fitting the experimental data (  $[\text{O}_2]_0 ; k_{\text{obs}}$  ) with equation (10) will, then, give a line with slope  $k_{\text{O}_2}$  and intercept  $k_{-02}$  (Figure S3).

The same measurements performed in a temperature range from  $-40^\circ\text{C}$  to  $-65^\circ\text{C}$  gave the corresponding rate constants. Data were fitted with the Eyring equation  $\ln( k h / k_{\text{B}} T ) = - ( \Delta H^\ddagger / RT ) + ( \Delta S^\ddagger / R )$  (where  $h$  = Planck constant,  $k_{\text{B}}$  = Boltzmann constant,  $T$  = temperature, and  $k$  = rate constant) for both  $k_{\text{O}_2}$  and  $k_{-02}$ . Temperature dependence studies were performed with both 436 nm and 683 nm excitation wavelengths (Figure S4).

Equilibrium constants  $K_{\text{O}_2}$  were calculated from the ratio  $k_{\text{O}_2} / k_{-02}$  at each temperature and the relative Van't Hoff plot was determined (Figure S5).

## **7. Quantum Efficiency Measurements**

Samples were prepared by bubbling  $\text{O}_{2(\text{g})}$  in solutions of  $[(\text{TMG}_3\text{tren})\text{Cu}^{\text{I}}]\text{BArF}$  and  $[(\text{PV-TMPA})\text{Cu}^{\text{I}}]\text{BArF}$  in dried and distilled 2-MeTHF at  $-130^\circ\text{C}$ . The absorbance of the samples at 436 nm and 683 nm (i.e. 0.082 at 683 nm) were monitored using a Cary 50 Bio spectrophotometer equipped with a liquid nitrogen chilled Unisoku USP-203-A cryostat. Two

actinometers were used:  $[\text{Ru}(\text{bpy})_3]\text{Cl}_2$  in  $\text{CH}_3\text{CN}$  at room temperature (RT) for the measurement at 436 nm and  $[\text{Os}(\text{bpy})_3](\text{PF}_6)_2$  in  $\text{CH}_3\text{CN}$  at RT for the measurements at 683 nm and their solutions were prepared to ensure to match the optical density of  $[(\text{TMG}_3\text{tren})\text{Cu}(\text{O}_2)]\text{BArF}$  and  $[(\text{PV-TMPA})\text{Cu}(\text{O}_2)]\text{BArF}$  at the relative excitation wavelengths. Data collection for the change in absorbance ( $\Delta A$ ) at the correspondent  $\lambda_{\text{max}}$  values (450 nm) where the change in extinction coefficients ( $\Delta \epsilon$ ) are known was made. The quantum yield at the two excitation wavelengths were calculated with equation (11):

$$\Phi(\text{LCuO}_2) = (\Delta A_{450}^{\text{Cu}} / \Delta A_{450}^{\text{Actin}}) (\Delta \epsilon_{450}^{\text{Actin}} / \Delta \epsilon_{450}^{\text{Cu}}) (n_{\text{MeTHF}}^2 / n_{\text{CH}_3\text{CN}}^2) \quad (11)$$

where "Actin" is  $[\text{Ru}(\text{bpy})_3]\text{Cl}_2$  in  $\text{CH}_3\text{CN}$  at RT for the 436 nm excitation wavelength and  $[\text{Os}(\text{bpy})_3](\text{PF}_6)_2$  in  $\text{CH}_3\text{CN}$  at RT for the 683 nm excitation wavelength. The values  $\Delta \epsilon_{450}^{[\text{Ru}(\text{bpy})_3]\text{Cl}_2} = -10600 \text{ M}^{-1} \text{ cm}^{-1}$ ,  $\Delta \epsilon_{450}^{[\text{Os}(\text{bpy})_3](\text{PF}_6)_2} = -7300 \text{ M}^{-1} \text{ cm}^{-1}$ ,  $\Delta \epsilon_{450}^{\text{Cu}} \equiv \Delta \epsilon_{450}^{[(\text{TMG}_3\text{tren})\text{Cu}(\text{O}_2)]\text{BArF}} = -3134 \text{ M}^{-1} \text{ cm}^{-1}$  and  $\Delta \epsilon_{450}^{\text{Cu}} \equiv \Delta \epsilon_{450}^{[(\text{PV-TMPA})\text{Cu}(\text{O}_2)]\text{BArF}} = 5531 \text{ M}^{-1} \text{ cm}^{-1}$  (determined in this work) were used. For the refractive index, the value 1.34163 for  $\text{CH}_3\text{CN}$  ( $n_{\text{CH}_3\text{CN}}$ ) at 298.15 K has been used<sup>9</sup> whereas a temperature correction of 0.00045 per Kelvin has been added to the refractive index of 2-MeTHF at 293.15 K (1.40751)<sup>10</sup> to obtain the refractive index which has been used for 2-MeTHF at 143.15 K in equation (11) ( $n_{\text{MeTHF}}$ ):  $1.40751 + [0.00045 \cdot (293.15 - 143.15)] = 1.47501$ .

## 8. DFT Calculations

The calculations were performed with ORCA 2.9.0 program.<sup>11</sup> A DFT spin-unrestricted formalism has been used and the Becke88<sup>12</sup> exchange and Perdew86<sup>12</sup> correlation nonlocal functionals were used as implemented in ORCA (BP86) for geometry optimizations whereas the Becke's three-parameter hybrid functional with the correlation functional of Lee, Yang, and Parr (B3LYP)<sup>13</sup> was used for the single point calculations as well as for the relaxed energy scans done to examine the reaction pathway. The def-2-TZVP basis set<sup>14</sup> present in ORCA was used for all atoms. Relativistic effects were accounted for through the ZORA<sup>15</sup> module implemented in ORCA and also Van der Waals forces<sup>16</sup> were considered in the calculations. Relaxed energy scans along the copper-oxygen distance were performed on the ground state triplet potential energy surface of  $[(\text{TMG}_3\text{tren})\text{Cu}(\text{O}_2)]^+$ . Results from TD-DFT calculations using localized orbitals are shown in Figure S6 and the DFT calculated O-O bond distance (S7) as a function of the Cu-O distance along the reaction pathway.

### 9. Table S(1): Comparison of Equilibrium Parameters Determined with Two Different Methods

**Table S1.** Comparison of Thermodynamic Parameters for O<sub>2</sub> binding to [(TMG<sub>3</sub>tren)Cu<sup>I</sup>]<sup>+</sup> determined with two different methods in 2-MeTHF solvent.

| Experiment                      | $\Delta H^{\circ,a}$ | $\Delta S^{\circ,b}$ |
|---------------------------------|----------------------|----------------------|
| Laser ( $\lambda_{exc}=436$ nm) | $-35 \pm 7$          | $-112 \pm 35$        |
| Benchtop Titration              | $-40 \pm 2$          | $-134 \pm 11$        |
| Previous work <sup>6</sup>      | $-35 \pm 3$          | $-96 \pm 13$         |

<sup>a</sup> $\Delta H^{\circ}$  values are in kJ mol<sup>-1</sup> <sup>b</sup> $\Delta S^{\circ}$  values are in J K<sup>-1</sup>mol<sup>-1</sup>

### 10. Figure S(1): Fit for the Determination of the Equilibrium Constant at -65<sup>0</sup>C

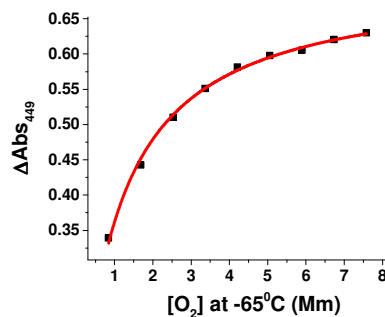

**Figure S1.** Determination of the equilibrium constant for the binding of [(TMG<sub>3</sub>tren)Cu<sup>I</sup>]BArF to O<sub>2</sub> at -65<sup>0</sup>C in 2-MeTHF solvent.

### 11. Figure S(2): Van't Hoff Plot Determined from Benchtop Titration Experiments

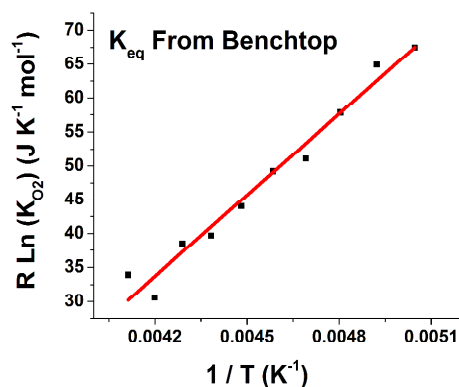

**Figure S2.** Van't Hoff plot for the variable temperature  $K_{O_2}$  data for the binding of  $[(TMG_3tren)Cu^I]BARF$  to  $O_2$  in 2-MeTHF solvent.

### 12. Figure S(3): Determination of $k_{O_2}$ and $k_{-O_2}$ in Pseudo-First-Order Conditions

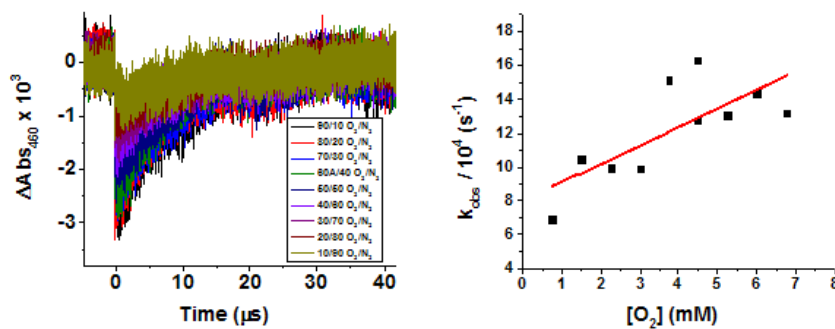

**Figure S3.** Left: Representative absorption changes monitored at 460 nm at various ratios of  $O_{2(g)}/N_{2(g)}$  at  $-40^\circ C$  in 2-MeTHF for  $[(TMG_3tren)Cu^I]^+ + O_2$ . Right: determination of  $k_{O_2}$  and  $k_{-O_2}$  fitting data with equation (10).



**13. Figure S(4): Eyring Analysis on Data Obtained from Transient Absorption Spectroscopy Exciting with either  $\lambda_{\text{exc}} = 436$  nm or  $\lambda_{\text{exc}} = 683$  nm Light**

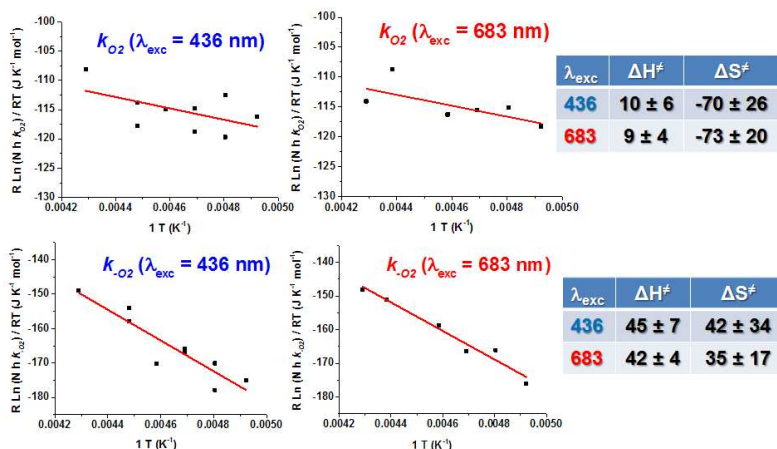

**Figure S4.** Determination of the activation parameters for the rate constants  $k_{O_2}$  and  $k_{-O_2}$  for  $[(\text{TMG}_3\text{tren})\text{Cu}]^+$  and  $[(\text{TMG}_3\text{tren})\text{CuO}_2]^+$ .

**14. Figure S(5): Van't Hoff Plot Determined from Transient Absorption Spectroscopic Data**

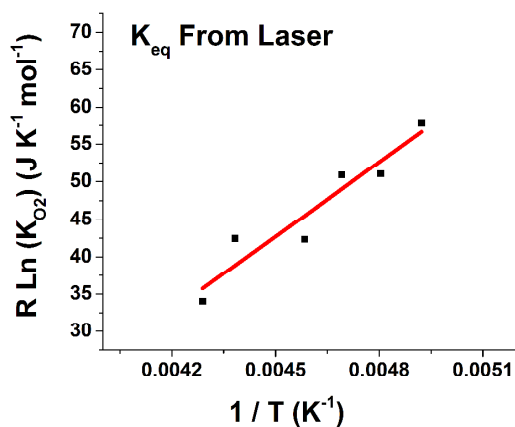

**Figure S5.** Van't Hoff plot for the equilibrium constants  $K_{O_2}$  determined through transient absorption spectroscopy.

**15. Figure S(6): Molecular Orbital Diagram for the [(TMG<sub>3</sub>tren)Cu(O<sub>2</sub>)]<sup>+</sup> Ground State**

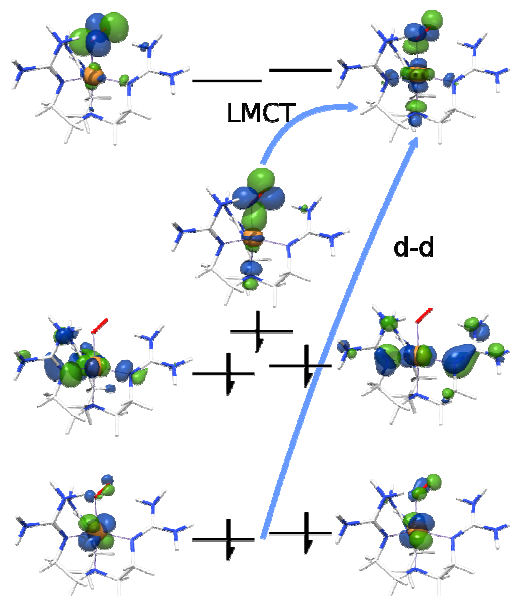

**Figure S6.** Localized orbital description for [(TMG<sub>3</sub>tren)Cu(O<sub>2</sub>)]<sup>+</sup>.

**16. Figure S(7): Calculated O-O Bond Length Trend upon Cu-O Bond Stretching**

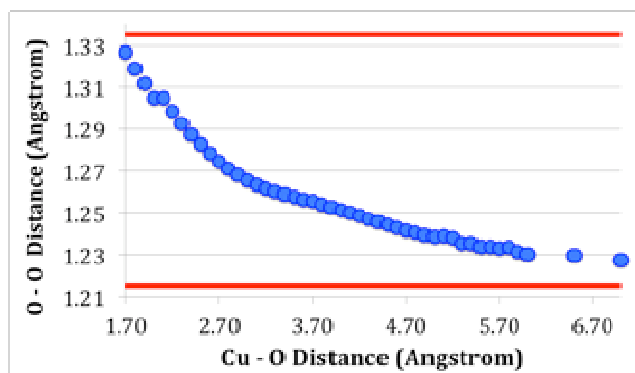

**Figure S7.** The O-O bond length decreases along the reaction pathway as the Cu-O bond length increases.

### 17. Figure S(8): Relation Between $K_{O_2}$ and Solvent Dielectric Constant

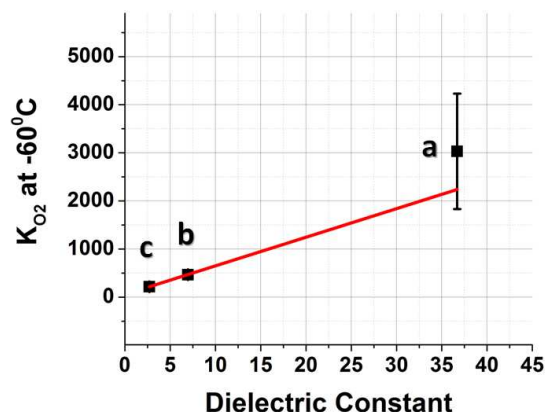

**Figure S8.**  $K_{O_2}$  values determined at  $-60^{\circ}\text{C}$  in different solvents as follows: a)  $K_{O_2}(\text{DMF}) = 3030 \pm 4340$  from Lanci et al. *J. Am. Chem. Soc.* **2007**, *129*, 14697; b)  $K_{O_2}(\text{MeTHF}) = 467 \pm 26$  determined in this work; c)  $K_{O_2}(\text{chlorobenzene}) = (K_{O_2}(\text{DMF}) / 14) = 216$  estimated from Lanci et al. *J. Am. Chem. Soc.* **2007**, *129*, 14697 and Lide, D. R. *CRC Handbook of Chemistry and Physics*, 74th ed.; CRC Press: Boca Raton, 1993. Dielectric constants for DMF, MeTHF, and chlorobenzene were taken as 37, 7, and 2.7, respectively

### 18. Figure S(9): Transient Absorption Spectra Obtained for **1** using $\lambda_{\text{exc}} = 436$ and 683 nm light

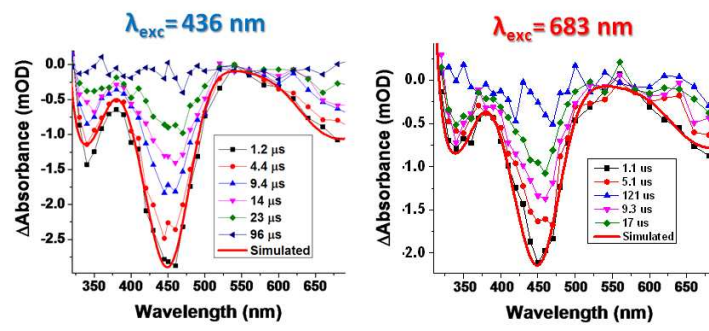

**Figure S9.** Transient absorption difference spectra collected at the indicated delay times after 436 nm and 683 nm laser excitation of **1** in MeTHF at 218 K. Overlaid in red on the experimental data is a simulated spectrum ( $\text{Abs}(\mathbf{3}) - \text{Abs}(\mathbf{1})$ )

### 19. Figure S(10): Absorption Spectra and Transient Absorption Spectra of 2 and 4

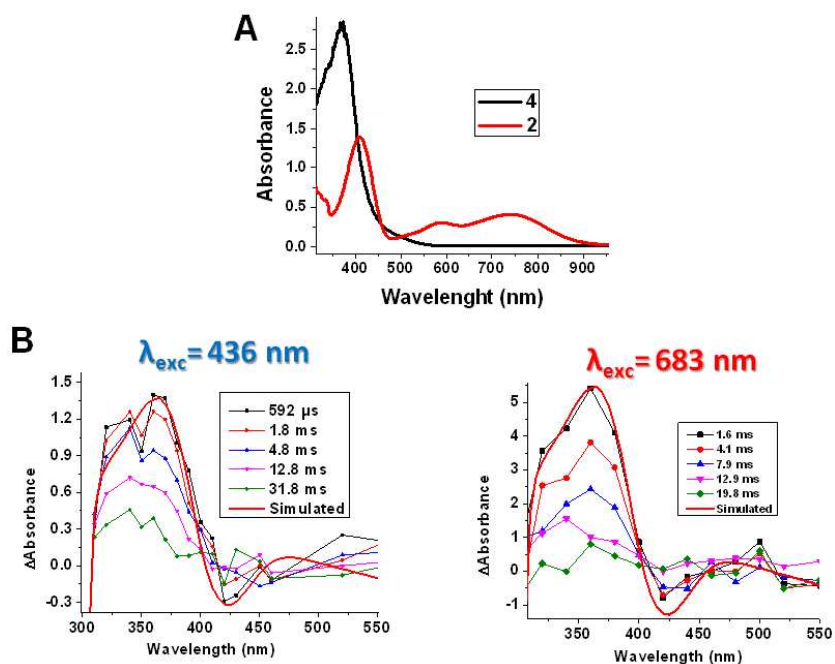

**Figure S10.** (A) Absorption spectrum of **2** (red line) obtained from oxygenation of **4** (black line) at 143 K in MeTHF. (B) Transient absorption difference spectra collected at the indicated delay times after 436 nm and 683 nm laser excitation of **2** in MeTHF at 143 K. Overlaid in red on the experimental data is a simulated spectrum (Abs(**4**)- Abs(**2**))

### 20. Figure S(11): Estimation of Activation Parameters for $4 + O_2 \rightarrow 2$ : Eyring plot

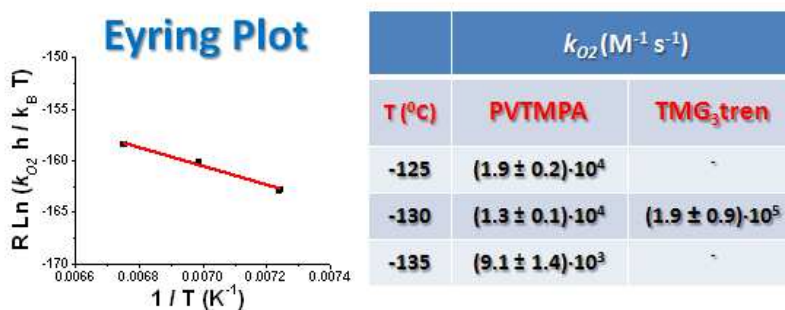

**Figure S11.** Determination of the activation parameters for the reaction between  $[(PVTMPA)Cu]^+$  and  $O_2$  following laser excitation ( $\lambda_{exc} = 436$  nm) of  $[(PV-TMPA)CuO_2]^+$  in

the temperature range 138 K to 148 K in MeTHF and comparison with the rate constant for the reaction between  $[(\text{TMG}_3\text{tren})\text{Cu}^{\text{I}}]^+$  and  $\text{O}_2$  extrapolated at 143 K

## 21. References

- (1) (a) Raab, V.; Kipke, J.; Burghaus, O.; Sundermeyer, J., *Inorg. Chem.* **2001**, *40*, 6964;(b) Liang, H. C.; Kim, E.; Incarvito, C. D.; Rheingold, A. L.; Karlin, K. D., *Inorg. Chem.* **2002**, *41*, 2209.
- (2) Peterson, R. L.; Himes, R. A.; Kotani, H.; Suenobu, T.; Tian, L.; Siegler, M. A.; Solomon, E. I.; Fukuzumi, S.; Karlin, K. D., *J. Am. Chem. Soc.* **2011**, *133*, 1702.
- (3) Fischer, K.; Wilken, M., *J. Chem. Thermodyn.* **2001**, *33*, 1285.
- (4) Battino, R., *IUPAC Solubility Data Series: Oxygen and Ozone; Pergamon: Oxford, New York* **1981**.
- (5) Argazzi, R.; Bignozzi, C. A.; Heimer, T. A.; Castellano, F. N.; Meyer, G. J., *J. Phys. Chem.* **1994**, *33*, 5741.
- (6) Lanci, M. P.; Smirnov, V. V.; Cramer, C. J.; Gauchenova, E. V.; Sundermeyer, J.; Roth, J. P., *J. Am. Chem. Soc.* **2007**, *129*, 14697.
- (7) Yoshimura, A.; Hoffman, M. Z.; Sun, H., *J. Photochem. Photobiol. A* **1993**, *70*, 29.
- (8) Bergeron, B. V.; Kelly, C. A.; Meyer, G. J., *Langmuir* **2003**, *19*, 8389.
- (9) Iloukhani, H.; Almasi, M., *Thermochim. Acta* **2009**, *495*, 139.
- (10) Preus, S.; Kilsa, K.; Wilhelmsson, L. M.; Albinsson, B., *Phys. Chem. Chem. Phys.* **2010**, *12*, 8881.
- (11) Neese, F., *ORCA, version 2.9.0; Max-Planck Institut für Bioanorganische Chemie: Mülheim, Germany*.
- (12) Perdew, J. P., *Phys. Rev. B* **1986**, *33*, 8822.
- (13) (a) Becke, A. D., *Phys. Rev. A* **1988**, *38*, 3098;(b) Becke, A. D., *J. Chem. Phys.* **1993**, *98*, 1372;(c) Becke, A. D., *J. Chem. Phys.* **1993**, *98*, 5648.
- (14) (a) Schaefer, A.; Horn, H.; Ahlrichs, R., *J. Chem. Phys.* **1992**, *97*, 2571;(b) Weigend, F.; Ahlrichs, R., *Phys. Chem. Chem. Phys.* **2005**, *7*, 3297.
- (15) (a) van Lenthe, E.; Baerends, E. J.; Snijders, J. G., *J. Chem. Phys.* **1993**, *99*, 4597;(b) van Wullen, C., *J. Chem. Phys.* **1998**, *109*, 392.
- (16) (a) Grimme, S.; Anthony, J.; Ehrlich, S.; Krieg, H., *J. Chem. Phys.* **2010**, *132*, 154104;(b) Grimme, S., *J. Comput. Chem.* **2006**, *27*, 1787;(c) Grimme, S., *J. Comput. Chem.* **2004**, *25*, 1463.
- (17) Sinnecker, S.; Rajendran, A.; Klamt, A.; Diedenhofen, M.; Neese, F., *J. Phys. Chem. A* **2006**, *110*, 2235.
